# Supplementary material
Source: Royal Society of Chemistry journal article supplement (doi:10.1039/d6cp01340f)
Supplement: d6cp01340f1.pdf [file d6cp01340f1.pdf]

## Supplementary Information

### **Molecular Origin of the Viscoelastic Transition in Molecular Granular Materials: Insights from Molecular Dynamics Simulations**

Chen Dong <sup>a</sup>, Junsheng Yang <sup>a, b \*</sup>, Panchao Yin <sup>a \*</sup>

<sup>a</sup> State Key Laboratory of Luminescent Materials and Devices & South China Advanced Institute for Soft Matter Science and Technology, Guangdong Basic Research Center of Excellence for Energy & Information Polymer Materials, South China University of Technology, Guangzhou 510641, China

<sup>b</sup> Institute of Emergent Elastomers, School of Materials Science and Engineering, South China University of Technology, Guangzhou 510640, China

\* Corresponding author.

E-mail: [jsyang20@scut.edu.cn](mailto:jsyang20@scut.edu.cn); [yinpc@scut.edu.cn](mailto:yinpc@scut.edu.cn)

## Methods of calculating configurational entropy

The method of calculating configurational entropy[1] is using the approximate entropy  $S'$  as a function of the classical variance,[2]

$$S' = \frac{k}{2} \ln \left( \frac{kT}{\hbar^2} m e^2 \langle \Delta x^2 \rangle_{cl} + 1 \right) \#(1)$$

with classical limit of the coordinate variance

$$\langle \Delta x^2 \rangle_{cl} = \frac{kT}{m\omega^2} \#(2)$$

where  $m$  and  $\omega$  are the mass and frequency of the one-dimensional quantum-mechanical harmonic oscillator respectively.

Generalizing the formula to multiple dimensions by introducing the covariance matrix of the coordinate fluctuations,[3]

$$\sigma_{ij} = \langle (x_i - \langle x_i \rangle)(x_j - \langle x_j \rangle) \rangle \#(3)$$

yields

$$S' = \frac{k}{2} \ln \det \left( \frac{kT e^2}{\hbar^2} M \sigma + \mathbf{1} \right) \#(4)$$

Where  $M$  and  $\mathbf{1}$  are the mass matrix and the unity matrix respectively.

So herein, we can get the covariance matrix  $\sigma$  by the simulation trajectory and further obtain the approximate configurational entropy  $S'$ .

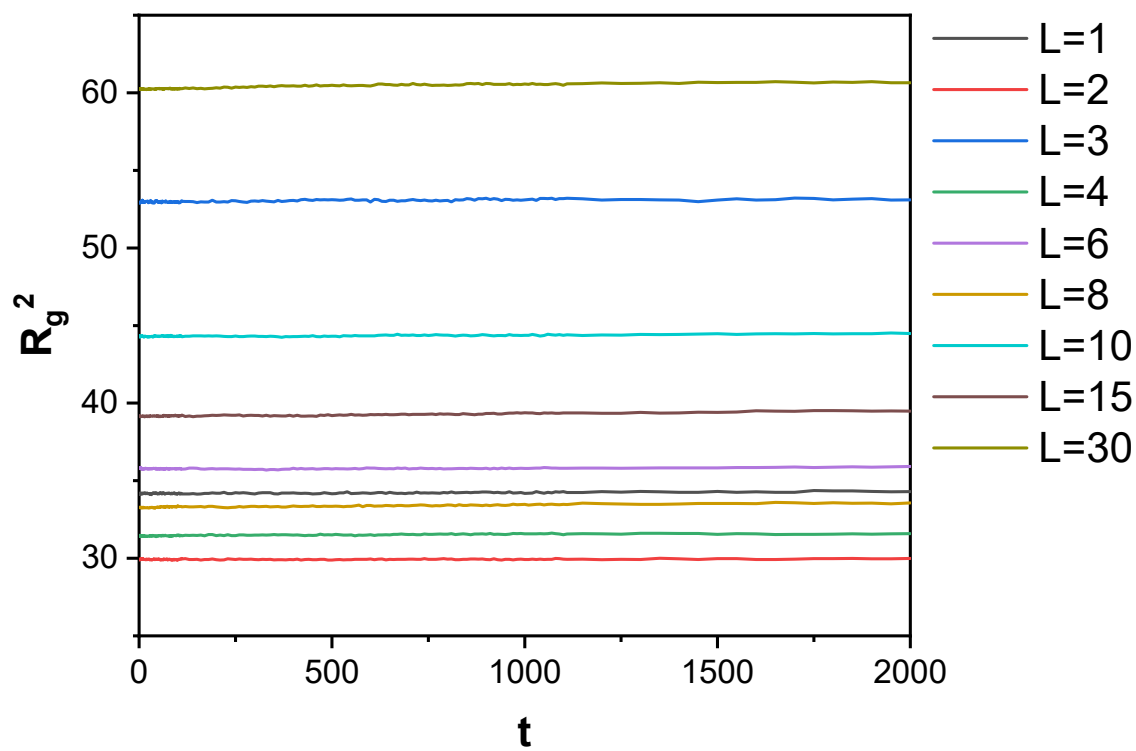

**Fig. S1** Squared radius of gyration versus time plot after relaxation process in *NPT* ensemble.

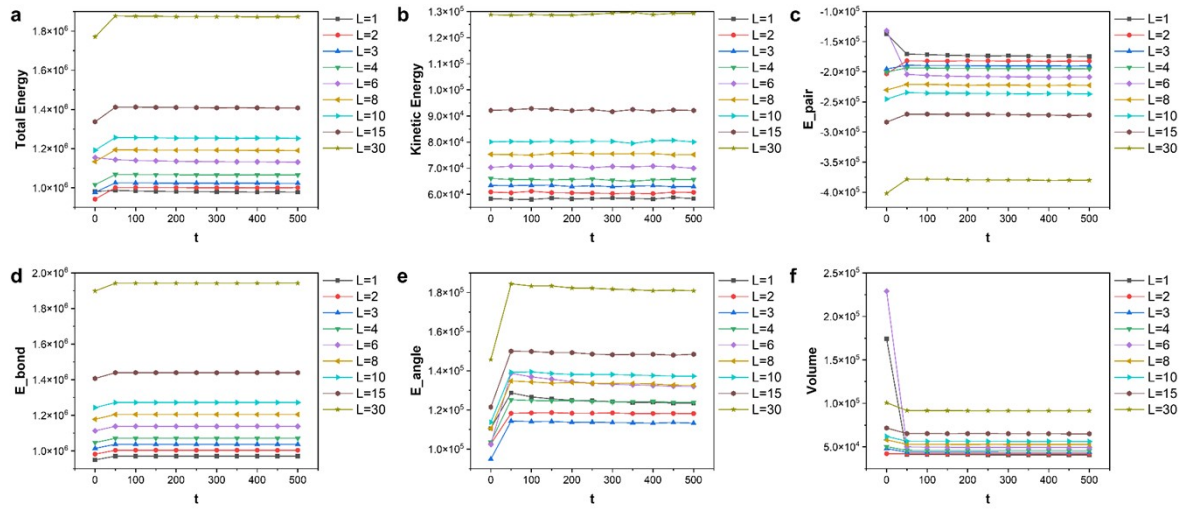

**Fig. S2** Energy parameters (a)-(e) and volume (f) during equilibrium process. Specifically, (a) total energy, (b) kinetic energy, (c)  $E_{\text{pair}}$ , (d)  $E_{\text{bond}}$ , (e)  $E_{\text{angle}}$ .

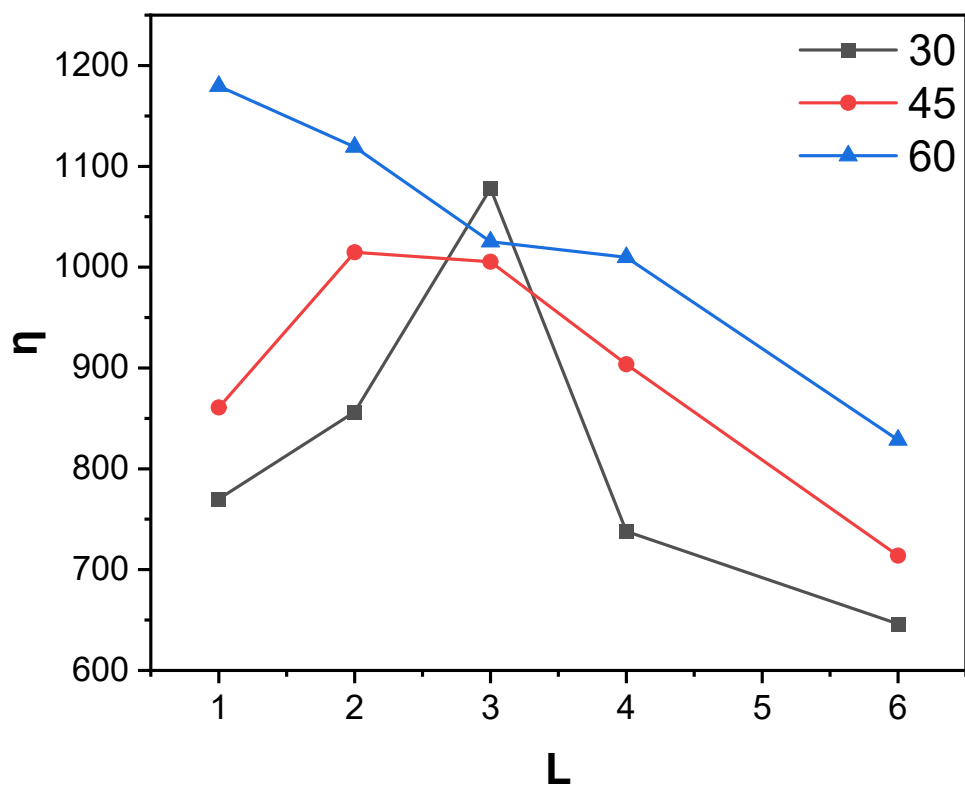

**Fig. S3** The linker chain length  $L$  dependence at temperature  $T = 1.0$  and pressure  $P = 1.0$  of the shear viscosity  $\eta$  with different main chain length.

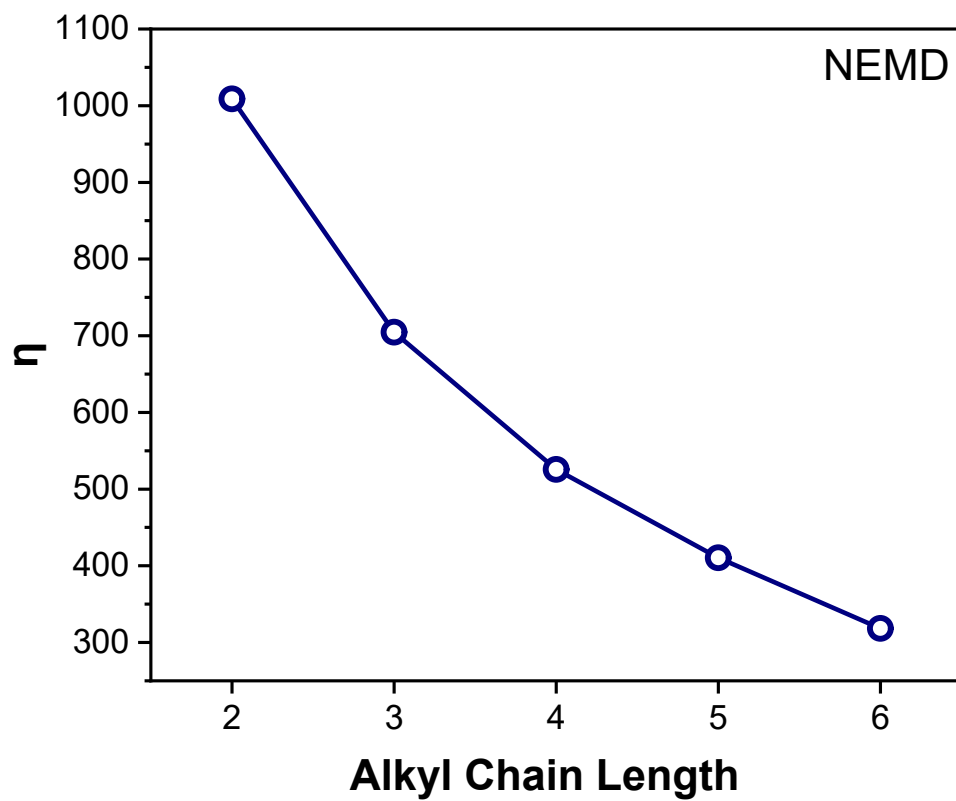

**Fig. S4** The alkyl chain length dependence at temperature  $T = 1.0$  and pressure  $P = 1.0$  of the shear viscosity  $\eta$  with linker chain length  $L = 3$ .

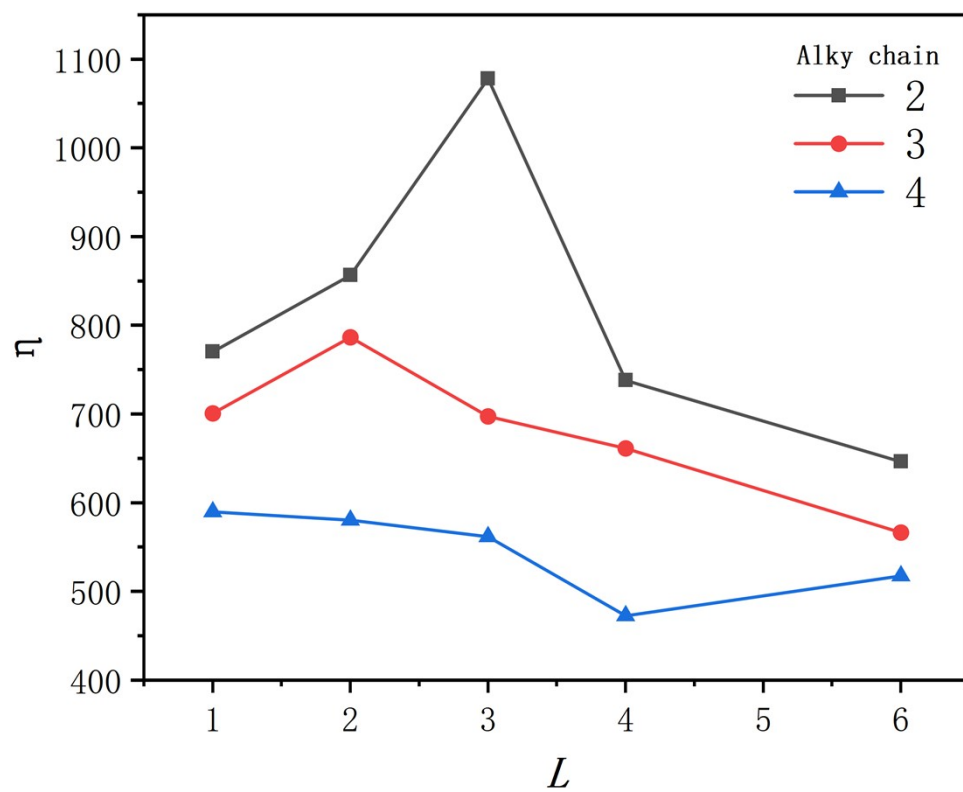

**Fig. S5** The linker chain length  $L$  dependence at temperature  $T = 1.0$  and pressure  $P = 1.0$  of the shear viscosity  $\eta$  with different alkyl chain length.

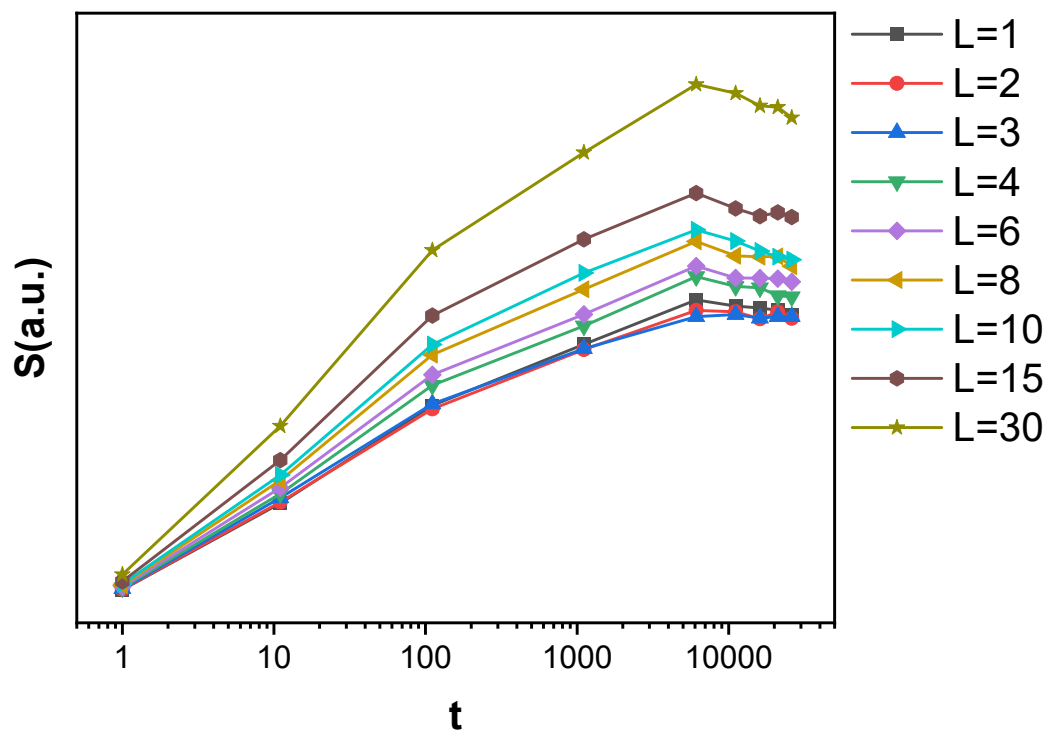

**Fig. S6** Time dependence of configurational entropy of different linker length  $L$ .

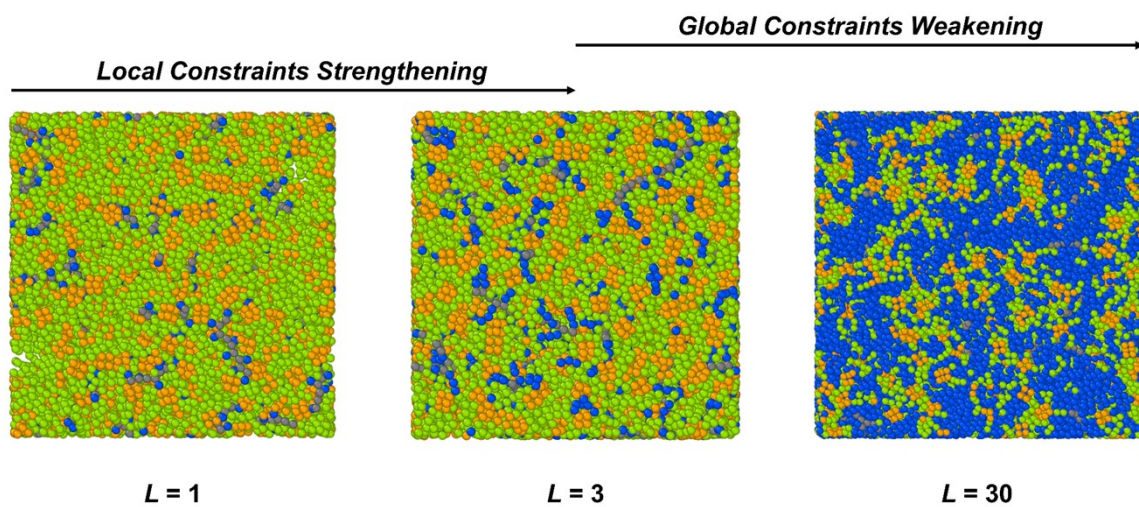

**Fig. S7** The MD simulations cross sections snapshots of different linker chain length  $L$ . Beads are colored using the same coloring scheme as Figure 1.

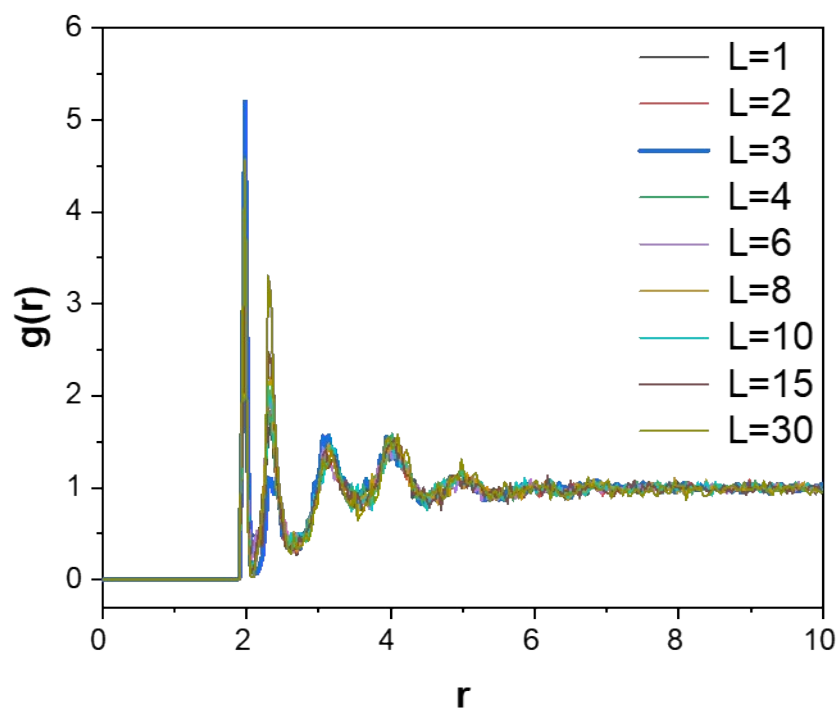

**Fig. S8** The radial distribution function of the center of mass of POSS cages (full-data version,  $0 < r < 10$ ).

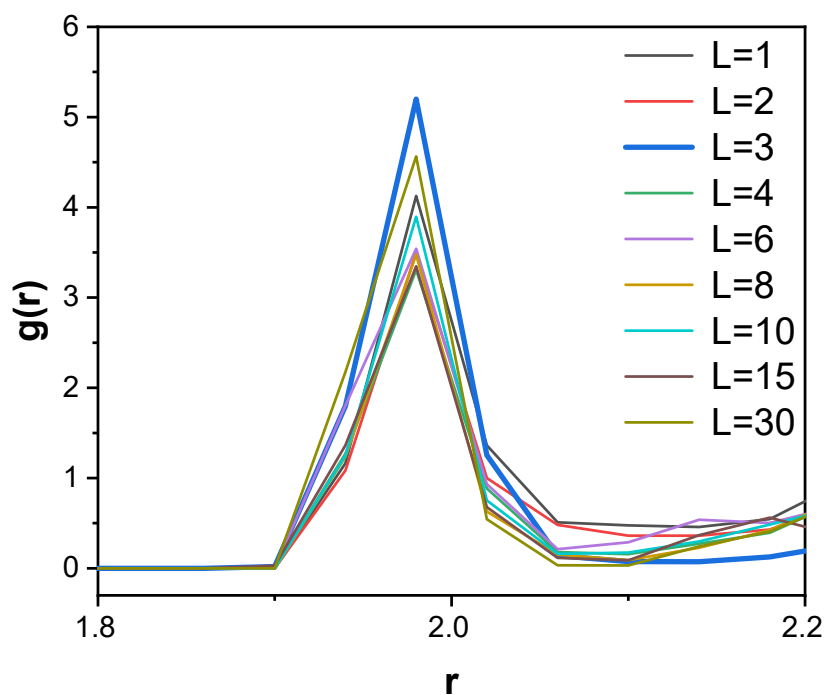

**Fig. S9** The radial distribution function of the center of mass of POSS cages (zoomed-in version,  $1.8 < r < 2.2$ ).

**Table S1** The peak value of the first peak of the radial distribution function of the center of mass of POSS cages.

| $L$        | 1    | 2    | 3    | 4    | 6    | 8    | 10   | 15   | 30   |
|------------|------|------|------|------|------|------|------|------|------|
| peak value | 4.13 | 3.50 | 5.20 | 3.31 | 3.54 | 3.48 | 3.90 | 3.35 | 4.56 |

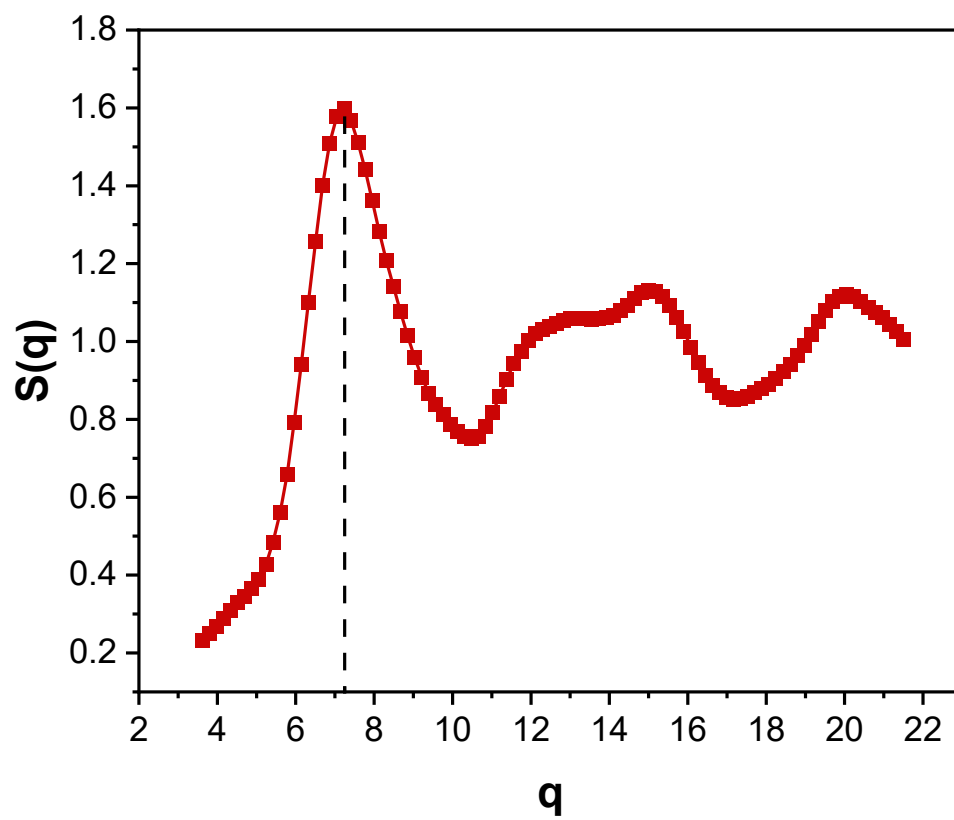

**Fig. S10.** The structure factor versus  $q$  plot, where the  $q$  value corresponding to the first peak represents the  $q_0$  value.

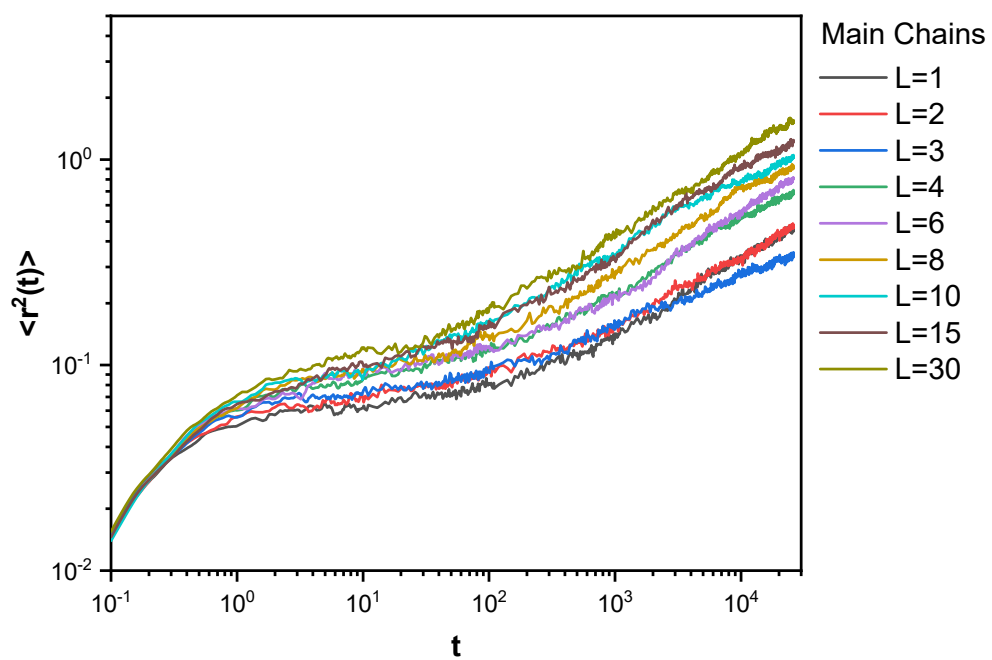

**Fig. S11.** Mean square displacement of main chain structure of PolyPOSSs with various linker chain length  $L$ .

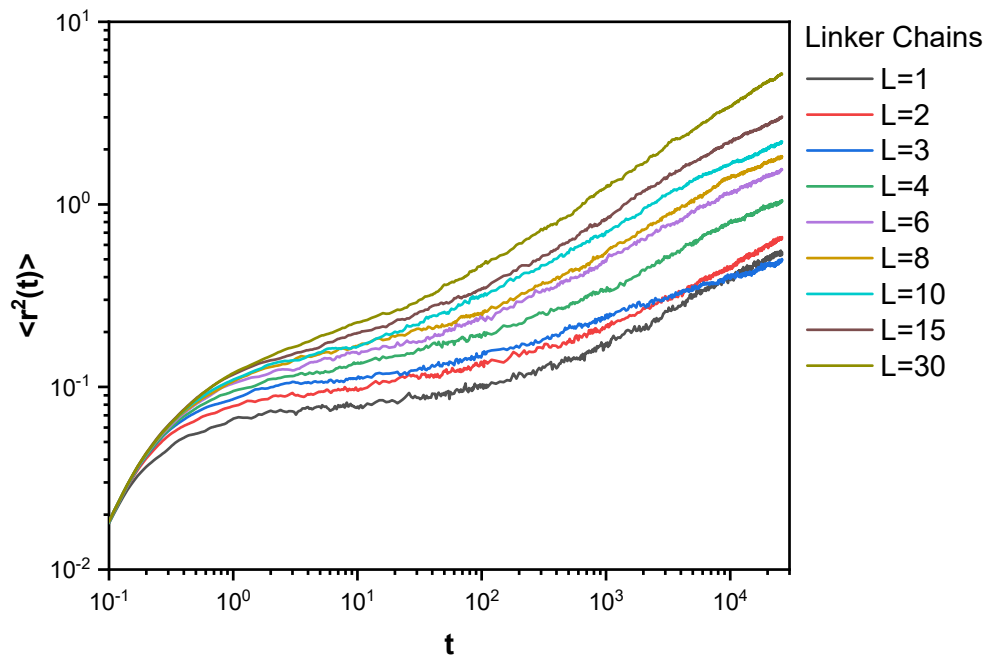

**Fig. S12.** Mean square displacement of linker chain structure of PolyPOSSs with various linker chain length  $L$ .

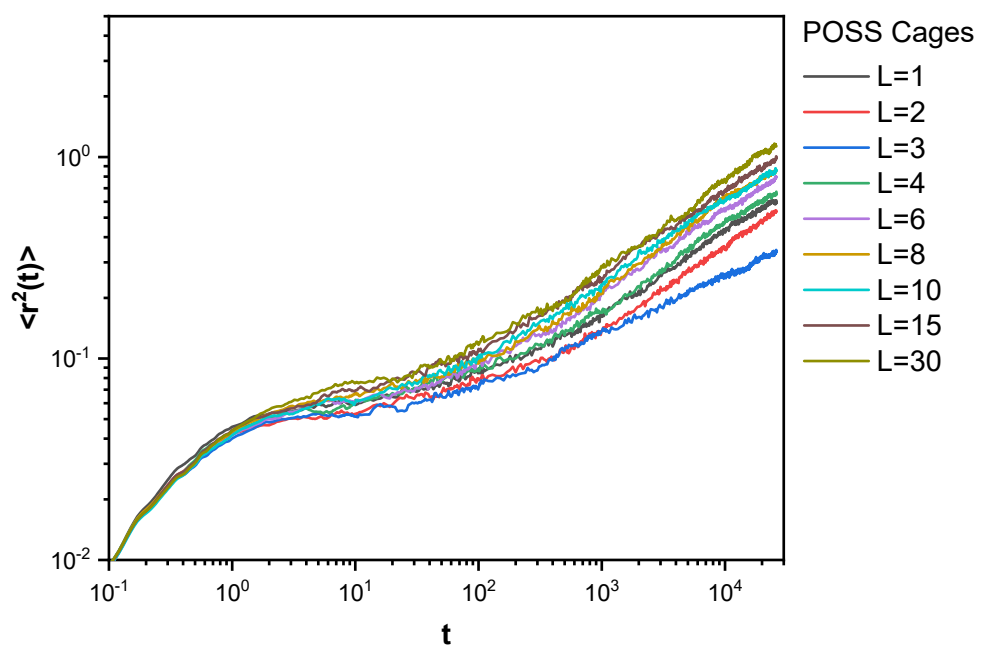

**Fig. S13.** Mean square displacement of POSS cage structure of PolyPOSSs with various linker chain length  $L$ .

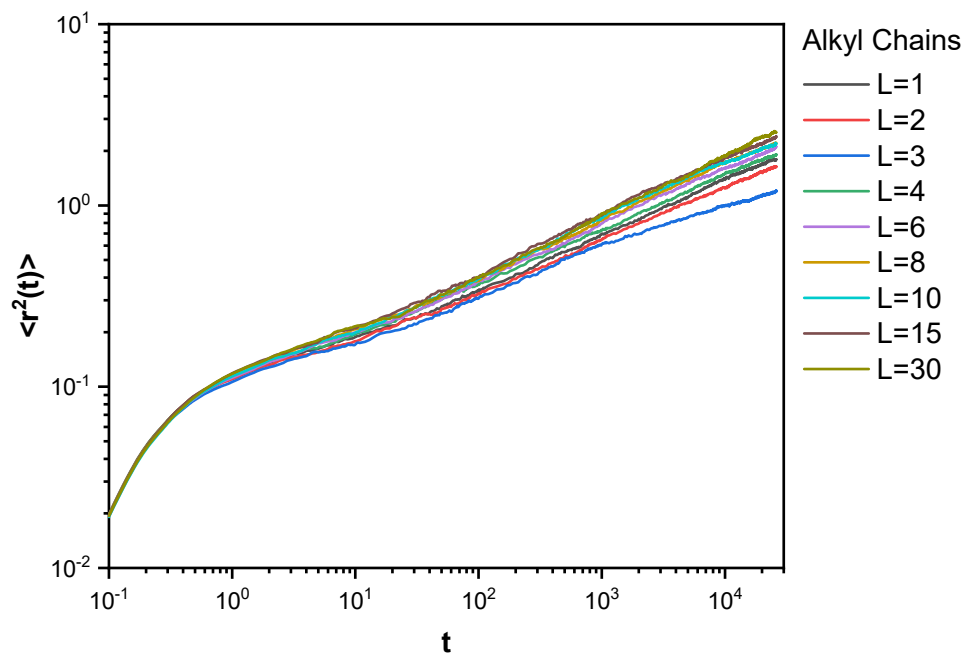

**Fig. S14.** Mean square displacement of alkyl chain structure of PolyPOSSs with various linker chain length  $L$ .

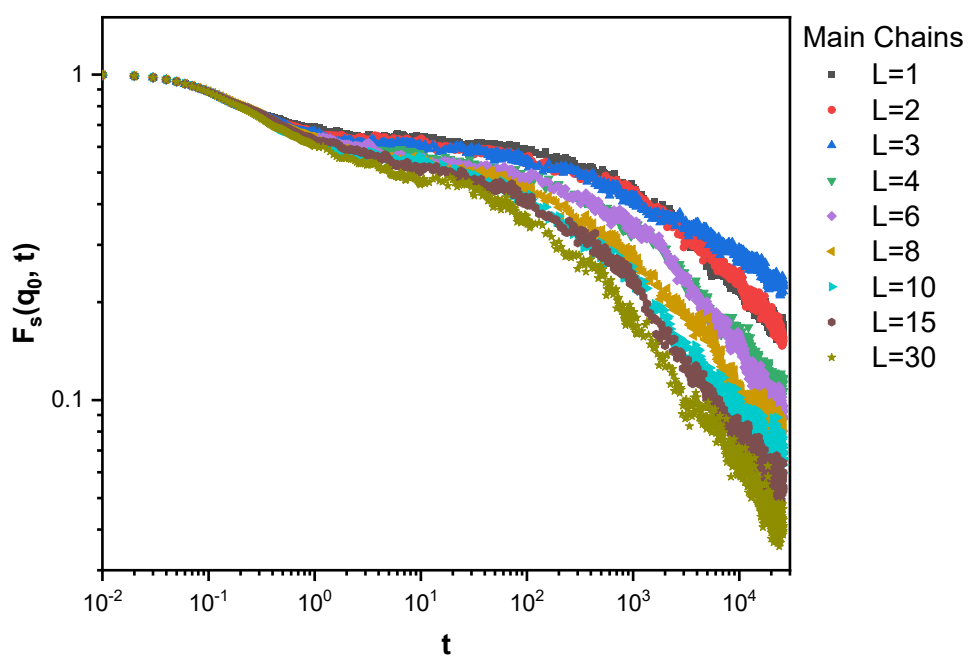

**Fig. S15.** Self-intermediate scattering function of main chain structure of PolyPOSSs with various linker chain length  $L$ .

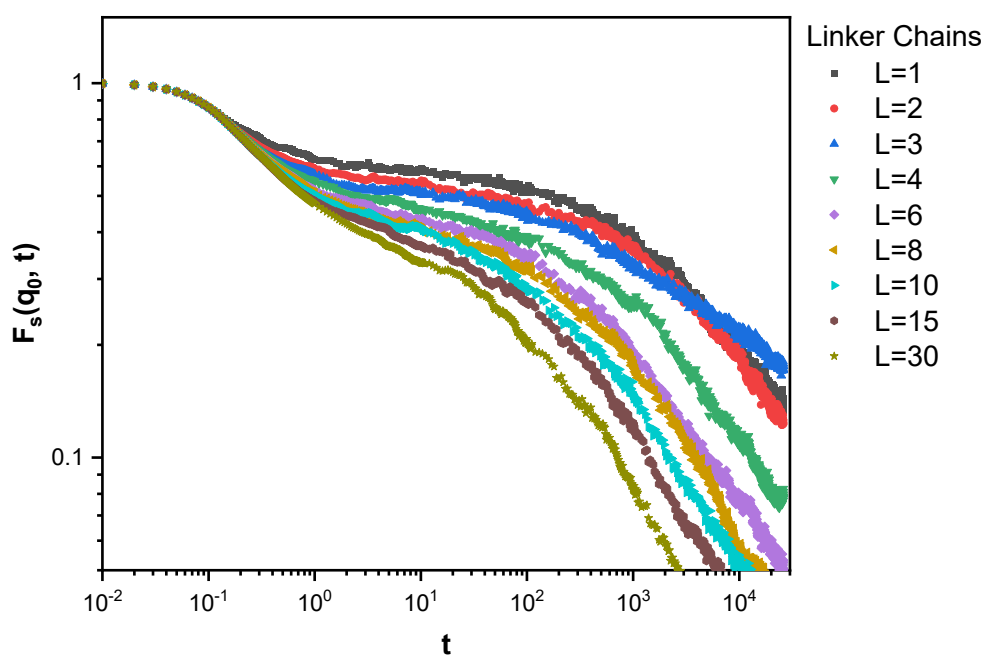

**Fig. S16.** Self-intermediate scattering function of linker chain structure of PolyPOSSs with various linker chain length  $L$ .

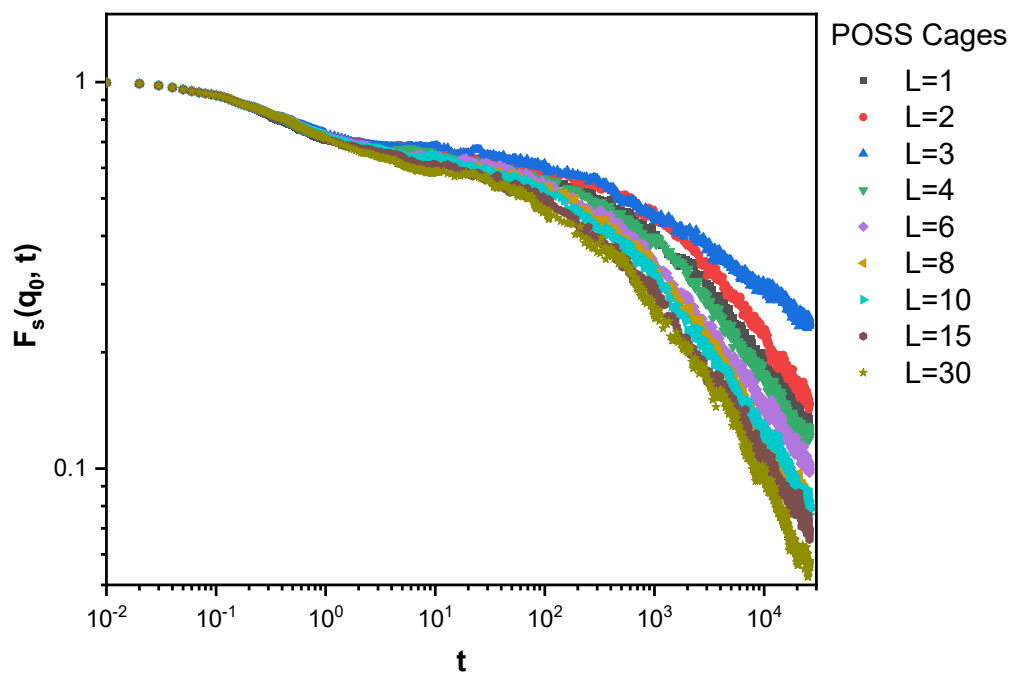

**Fig. S17.** Self-intermediate scattering function of POSS cage structure of PolyPOSSs with various linker chain length  $L$ .

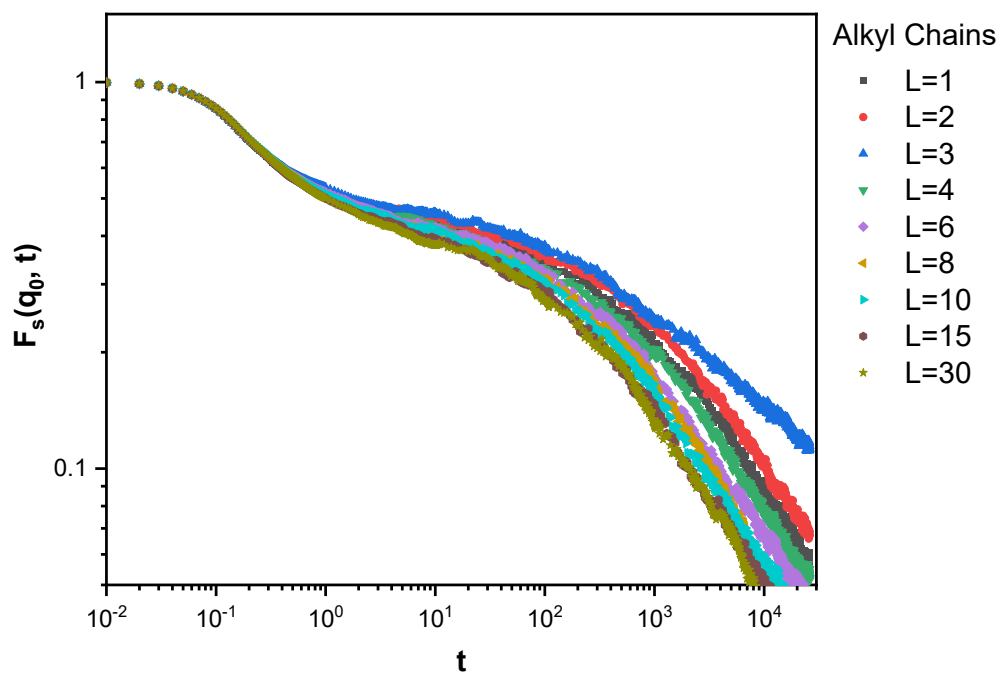

**Fig. S18.** Self-intermediate scattering function of alkyl chain structure of PolyPOSSs with various linker chain length  $L$ .

## Reference

- [1] I. Andricioaei, M. Karplus, On the Calculation of Entropy from Covariance Matrices of the Atomic Fluctuations, *J. Chem. Phys.* 115(14) (2001) 6289-6292.
- [2] J. Schlitter, Estimation of Absolute and Relative Entropies of Macromolecules Using the Covariance Matrix, *Chem. Phys. Lett.* 215(6) (1993) 617-621.
- [3] M. Karplus, J.N. Kushick, Method for Estimating the Configurational Entropy of Macromolecules, *Macromolecules* 14(2) (1981) 325-332.
